# Supplementary material for: DZNep, an inhibitor of the histone methyltransferase EZH2, suppresses hepatic fibrosis through regulating miR-199a-5p/SOCS7 pathway
Source: PeerJ journal article supplement (doi:10.7717/peerj.11374), 2021-05-14
Supplement: Raw_Data.7z [file Figure 2.xlsx]

## Sheet: Figure 2a 
Hole location	channel	CT value	type	Name of the target	Group no.
A01	FAM	11.12	unknown	mok	0	18S
A02	FAM	11.06	unknown	mok	0		NC
A03	FAM	10.9	unknown	mok	0
A04	FAM	19.15	unknown	mok	0	EZH2
A05	FAM	19.11	unknown	mok	0
A06	FAM	18.9	unknown	mok	0
A07	FAM	11.25	unknown	mok	0	18S	TGF-β1
A08	FAM	11.37	unknown	mok	0
A09	FAM	11.41	unknown	mok	0
A10	FAM	17.47	unknown	mok	0	EZH2
A11	FAM	17.76	unknown	mok	0
A12	FAM	17.48	unknown	mok	0
C01	FAM	11.32	unknown	mok	0	18S	TGF-β1+Dznep
C02	FAM	11.27	unknown	mok	0
C03	FAM	11.21	unknown	mok	0
C04	FAM	18.57	unknown	mok	0	EZH2
C05	FAM	19	unknown	mok	0
C06	FAM	18.65	unknown	mok	0

## Sheet: Figure 2b 
Hole location	channel	CT value	type	Name of the target	Group no.
A01	FAM	11.06	unknown	mok	0	18S
A02	FAM	11.05	unknown	mok	0		NC
A03	FAM	11.09	unknown	mok	0
A04	FAM	19.01	unknown	mok	0	COL I
A05	FAM	19.03	unknown	mok	0
A06	FAM	19.03	unknown	mok	0
A07	FAM	11.04	unknown	mok	0	18S	TGF-β
A08	FAM	11.13	unknown	mok	0
A09	FAM	11.14	unknown	mok	0
A10	FAM	11.04	unknown	mok	0	COL I
A11	FAM	11.13	unknown	mok	0
A12	FAM	11.14	unknown	mok	0
C01	FAM	11.08	unknown	mok	0	18S	TGF-β+Dznep
C02	FAM	11.02	unknown	mok	0
C03	FAM	11.13	unknown	mok	0
C04	FAM	17.57	unknown	mok	0	COL I
C05	FAM	17.78	unknown	mok	0
C06	FAM	17.49	unknown	mok	0

## Sheet: Figure 2c
Hole location	channel	CT value	type	Name of the target	Group no.
A01	FAM	11.08	unknown	mok	0	18S
A02	FAM	11.11	unknown	mok	0		NC
A03	FAM	11.04	unknown	mok	0
A04	FAM	18.97	unknown	mok	0	α-SMA
A05	FAM	19.01	unknown	mok	0
A06	FAM	18.95	unknown	mok	0
A07	FAM	11.09	unknown	mok	0	18S	TGF-β
A08	FAM	11.13	unknown	mok	0
A09	FAM	11.07	unknown	mok	0
A10	FAM	16.26	unknown	mok	0	α-SMA
A11	FAM	16.26	unknown	mok	0
A12	FAM	16.37	unknown	mok	0
C01	FAM	11.12	unknown	mok	0	18S	TGF-β+Dznep
C02	FAM	11.06	unknown	mok	0
C03	FAM	11.04	unknown	mok	0
C04	FAM	17.39	unknown	mok	0	α-SMA
C05	FAM	17.66	unknown	mok	0
C06	FAM	17.45	unknown	mok	0
