# Supplementary material for: DZNep, an inhibitor of the histone methyltransferase EZH2, suppresses hepatic fibrosis through regulating miR-199a-5p/SOCS7 pathway
Source: PeerJ journal article supplement (doi:10.7717/peerj.11374), 2021-05-14
Supplement: Raw_Data.7z [file Figure 3.xlsx]

## Sheet: fig3B mrna
channel	CT value	type	Name of the target	Group no.
FAM	11.16	unknown	mok	0	U6
FAM	11.11	unknown	mok	0		NC
FAM	11.13	unknown	mok	0
FAM	19.03	unknown	mok	0	199a-5p
FAM	19.02	unknown	mok	0
FAM	19.06	unknown	mok	0
FAM	11.06	unknown	mok	0	U6	TGF-β
FAM	11.04	unknown	mok	0
FAM	11.09	unknown	mok	0
FAM	16.06	unknown	mok	0	199a-5p
FAM	15.89	unknown	mok	0
FAM	16.28	unknown	mok	0
FAM	11.13	unknown	mok	0	U6	TGF-β+Dznep
FAM	11.05	unknown	mok	0
FAM	11.11	unknown	mok	0
FAM	17.4	unknown	mok	0	199a-5p
FAM	16.98	unknown	mok	0
FAM	17.8	unknown	mok	0

## Sheet: 3C mrna
channel	CT value	type	Name of the target	Group no.
FAM	11.05	unknown	mok	0	U6
FAM	11.16	unknown	mok	0		NC
FAM	11.08	unknown	mok	0
FAM	19.05	unknown	mok	0	199a-5p
FAM	19.15	unknown	mok	0
FAM	19.05	unknown	mok	0
FAM	11.06	unknown	mok	0	U6
FAM	11.11	unknown	mok	0		TGF-B1+NC-inhibitor
FAM	11.16	unknown	mok	0
FAM	16.47	unknown	mok	0	199a-5p
FAM	16.7	unknown	mok	0
FAM	16.82	unknown	mok	0
FAM	11.05	unknown	mok	0	U6
FAM	11.16	unknown	mok	0		TGF-B1+miR-199a-5p inhibitor
FAM	11.03	unknown	mok	0
FAM	18.85	unknown	mok	0	199a-5p
FAM	17.93	unknown	mok	0
FAM	18.34	unknown	mok	0

## Sheet: 3D mrna
		CT value	channel
NC	18s	11.13	FAM
		11.05	FAM
		11.01	FAM
	COL1	19.04	FAM
		19.22	FAM
		19.05	FAM
TGF-B1+NC-inhibitor	18s	11.06	FAM
		11.08	FAM
		11.02	FAM
	COL1	16.74	FAM
		16.87	FAM
		16.56	FAM
TGF-B1+miR-199a-5p inhibitor	18s	11.09	FAM
		11.04	FAM
		11.07	FAM
	COL1	17.75	FAM
		18.43	FAM
		18.12	FAM

## Sheet: 3E mrna
		CT value	channel
NC	18s	11.07	FAM
		11.08	FAM
		11.15	FAM
	a-SMA	19.1	FAM
		19.12	FAM
		19.15	FAM
TGF-B1+NC-inhibitor	18s	11.06	FAM
		11.09	FAM
		11	FAM
	a-SMA	16.79	FAM
		16.92	FAM
		16.64	FAM
TGF-B1+miR-199a-5p inhibitor	18s	11.09	FAM
		11.05	FAM
		11.05	FAM
	a-SMA	17.88	FAM
		18.13	FAM
		18.5	FAM
