# Supplementary material for: DZNep, an inhibitor of the histone methyltransferase EZH2, suppresses hepatic fibrosis through regulating miR-199a-5p/SOCS7 pathway
Source: PeerJ journal article supplement (doi:10.7717/peerj.11374), 2021-05-14
Supplement: Raw_Data.7z [file Figure 4.xlsx]

## Sheet: f4b mrna
	18s	SKP2	CT2-CT1		∆CT - the mean value of ∆CT in the control group	2-∆∆CT power		Mean 2-∆∆CT of 2-∆∆CT/control group	Average
	CT1	CT2	∆CT	The mean value of ∆CT in the control group	∆∆CT	2-∆∆CT	Mean value of 2-∆∆CT in control group	The mean value of 2-CT in the control group was 1
NC mimic	11.08	19.01	7.93	7.97667	-0.0466667	1.03288	1.00033	1.03254
	11.01	19.03	8.02	7.97667	0.0433333	0.97041	1.00033	0.970094
	11.05	19.03	7.98	7.97667	0.00333333	0.997692	1.00033	0.997367	1	0.0313057
			7.97667			1.00033
miR-199a-5p mimic	11.16	15	3.84	7.97667	-4.13667	17.5898	1.00033	17.5841
	11.17	15.23	4.06	7.97667	-3.91667	15.102	1.00033	15.0971
	11.11	14.85	3.74	7.97667	-4.23667	18.8523	1.00033	18.8461	17.1758	1.90759

## Sheet: 4d mrna
	18s	SKP2	CT2-CT1		∆CT - the mean value of ∆CT in the control group	2-∆∆CT power		Mean 2-∆∆CT of 2-∆∆CT/control group	Average
	CT1	CT2	∆CT	The mean value of ∆CT in the control group	∆∆CT	2-∆∆CT	Mean value of 2-∆∆CT in control group	The mean value of 2-CT in the control group was 1
NC mimic	11.16	19.05	7.89	7.91333	-0.0233333	1.0163	1.0001	1.0162
	11.1	19.01	7.91	7.91333	-0.00333333	1.00231	1.0001	1.00221
	11.05	18.99	7.94	7.91333	0.0266667	0.981686	1.0001	0.981586	1	0.0174134
			7.91333			1.0001
miR-199a-5p mimic	11.11	19.51	8.4	7.91333	0.486667	0.713672	1.0001	0.7136
	11.16	19.64	8.48	7.91333	0.566667	0.675175	1.0001	0.675107
	11.05	19.79	8.74	7.91333	0.826667	0.56383	1.0001	0.563773	0.650827	0.0778083

## Sheet: 4f wb
Actin	0.72	0.72		Background 0.03
	0.73	0.74
	0.75	0.71
SOCS7	0.19	0.08		Background 0.07
	0.2	0.1
	0.28	0.13
