# Supplementary material for: DZNep, an inhibitor of the histone methyltransferase EZH2, suppresses hepatic fibrosis through regulating miR-199a-5p/SOCS7 pathway
Source: PeerJ journal article supplement (doi:10.7717/peerj.11374), 2021-05-14
Supplement: Raw_Data.7z [file Figure 5.xlsx]

## Sheet: 5d mrna
		CT value	channel
NC	18s	11.05	FAM
		11	FAM
		11.16	FAM
	SOCS7	19.04	FAM
		19.24	FAM
		19.2	FAM
Dznep+si NC	18s	11.06	FAM
		11.1	FAM
		11.05	FAM
	SOCS7	16.58	FAM
		16.41	FAM
		16.42	FAM
Dznep+si SOCS7	18s	11.16	FAM
		11.14	FAM
		11.11	FAM
	SOCS7	18.82	FAM
		21.1	FAM
		19.6	FAM

## Sheet: 5e mrna
		CT value	channel
NC	18s	11.08	FAM
		11.16	FAM
		11.11	FAM
	COL1	19.16	FAM
		19.24	FAM
		19.25	FAM
Dznep+si NC	18s	11.12	FAM
		11.05	FAM
		11.08	FAM
	COL1	19.76	FAM
		20.12	FAM
		19.41	FAM
Dznep+si SOCS7	18s	11.08	FAM
		11.01	FAM
		11.13	FAM
	COL1	19.21	FAM
		19.08	FAM
		18.97	FAM

## Sheet: 5f mrna
		CT value	channel
NC	18s	11.07	FAM
		11.15	FAM
		11.16	FAM
	a-SMA	19.21	FAM
		19.25	FAM
		19.23	FAM
Dznep+si NC	18s	11.18	FAM
		11.15	FAM
		11.05	FAM
	a-SMA	19.79	FAM
		20.05	FAM
		19.96	FAM
Dznep+si SOCS7	18s	11.09	FAM
		11.16	FAM
		11.05	FAM
	a-SMA	19.46	FAM
		19.57	FAM
		19.13	FAM
